# Supplementary material for: Immunohistochemical detection of chlamydia trachomatis in sexually transmitted infectious proctitis
Source: Springer Nature journal article supplement (doi:10.1186/s12876-022-02233-w), 2022-04-08
Supplement: MOESM8 [file 20297256]

**RAW DATA TABLE. Histology and endoscopic findings Proctitis ITS. 2015-2020 Lima. Peru**

| code             | HC                             | age | gender | endoscopy lesion  | HIV          | VDRL          | treponemic specific tests | branched crypts          | dilated crypts         | inflammation                                                 | neutrophils         | cryptitis         | eosinophils per HPF | lymph follicles         | IHC chlamydia          |
|------------------|--------------------------------|-----|--------|-------------------|--------------|---------------|---------------------------|--------------------------|------------------------|--------------------------------------------------------------|---------------------|-------------------|---------------------|-------------------------|------------------------|
| 15-4282          | 851275                         | 38  | M      | multiple ulcers   | HIV POSITIVE | VDRL POSITIVE | POSITIVO                  | branched crypts presents | dilated crypts present | inflamación basal presente                                   | neutrophils present | cryptitis present | 0                   | I.p.absent              | CHLAMYDIA IHC NEGATIVE |
| 15-7002          | 1276621                        | 38  | M      | multiple ulcers   | HIV POSITIVE | VDRL POSITIVE | NOT STATED                | branched crypt absent    | dilated crypts present | inflamación basal presente                                   | neutrophils present | cryptitis present | 4                   | lymph follicles present | CHLAMYDIA IHC NEGATIVE |
| 15-8172          | 811034                         | 44  | M      | tumor or mass     | HIV NEGATIVE | NOT STATED    | NOT STATED                | branched crypt absent    | dilated crypts present | basal inflammation                                           | neutrophils present | cryptitis present | 4                   | I.p.absent              | CHLAMYDIA IHC NEGATIVE |
| 15-8890          | 1444905                        | 27  | M      | multiple ulcers   | HIV POSITIVE | VDRL POSITIVE | NOT STATED                | branched crypts presents | dilated crypts present | inflamación basal presente                                   | neutrophils present | cryptitis present | 3                   | I.p.absent              | CHLAMYDIA IHC POSITIVE |
| 16-0185          |                                | 28  | M      | tumor or mass     | HIV POSITIVE | VDRL NEGATIVE | NOT STATED                | branched crypt absent    | dilated crypts present | basal inflammation                                           | neutrophils present | ABSENT            | 2                   | I.p.absent              | NOT ASSESSED           |
| 16-3613          | 972783                         | 31  | M      | multiple ulcers   | HIV POSITIVE | VDRL POSITIVE | POSITIVO                  | branched crypt absent    | dilated crypts present | inflamación basal presente                                   | neutrophils present | ABSENT            | 4                   | I.p.absent              | CHLAMYDIA IHC POSITIVE |
| 17-0586          | 1561541                        | 22  | M      | ulcers and polyps | HIV POSITIVE | NOT STATED    | NOT STATED                | branched crypt absent    | dilated crypts present | basal inflammation                                           | ABSENT              | ABSENT            | 0                   | lymph follicles present | NOT ASSESSED           |
| 17-4160          | 1156247                        | 43  | M      | multiple ulcers   | HIV POSITIVE | VDRL NEGATIVE | NOT STATED                | branched crypt absent    | dilated crypts present | basal inflammation                                           | neutrophils present | cryptitis present | 3                   | I.p.absent              | NOT ASSESSED           |
| 17-6828          |                                | 25  | M      | tumor or mass     | HIV POSITIVE | NOT STATED    | NOT STATED                | branched crypts presents | dilated crypts present | absent                                                       | neutrophils present | cryptitis present | 3                   | I.p.absent              | CHLAMYDIA IHC NEGATIVE |
| 18-2607          | 500134                         | 30  | M      | multiple ulcers   | HIV POSITIVE | VDRL POSITIVE | NOT STATED                | branched crypts presents | dilated crypts present | inflamación basal presente                                   | neutrophils present | cryptitis present | 0                   | I.p.absent              | CHLAMYDIA IHC NEGATIVE |
| 18-3314-1        | pARTICULAR pero es del carrion | 21  | m      | multiple ulcers   | HIV NEGATIVE | VDRL POSITIVE | NEGATIVO                  | branched crypt absent    | ABSENT                 | inflamación basal ausente                                    | neutrophils present | cryptitis present | 3                   | lymph follicles present | CHLAMYDIA IHC POSITIVE |
| 18-5528          | particular                     | 25  | M      | tumor or mass     | HIV POSITIVE | VDRL POSITIVE | POSITIVO                  | branched crypts presents | dilated crypts present | inflamación basal presente                                   | neutrophils present | cryptitis present | 1                   | I.p.absent              | CHLAMYDIA IHC POSITIVE |
| 18-6893          | 1561546                        | 25  | M      | multiple ulcers   | HIV POSITIVE | VDRL POSITIVE | NEGATIVO                  | branched crypt absent    | dilated crypts present | inflamación basal presente con granuloma incompleto          | neutrophils present | ABSENT            | 10                  | I.p.absent              | CHLAMYDIA IHC NEGATIVE |
| 18-7240          | 765352                         | 35  | M      | ulcers and polyps | HIV POSITIVE | NOT STATED    | NOT STATED                | branched crypts presents | dilated crypts present | basal inflammation                                           | neutrophils present | cryptitis present | 0                   | lymph follicles present | CHLAMYDIA IHC POSITIVE |
| 18-9283          | 309470                         | 47  | M      | proctitis         | HIV POSITIVE | VDRL POSITIVE | POSITIVO                  | branched crypt absent    | dilated crypts present | inflamación basal presente                                   | neutrophils present | cryptitis present | 0                   | I.p.absent              | CHLAMYDIA IHC POSITIVE |
| 19-0991-2        | 821547                         | 50  | M      | ulcers and polyps | HIV POSITIVE | VDRL NEGATIVE | NOT STATED                | branched crypt absent    | dilated crypts present | basal inflammation                                           | neutrophils present | cryptitis present | 3                   | lymph follicles present | CHLAMYDIA IHC POSITIVE |
| 19-2713          |                                | 25  | M      | ulcers and polyps | HIV POSITIVE | NOT STATED    | NOT STATED                | branched crypt absent    | ABSENT                 | absent                                                       | neutrophils present | cryptitis present | 2                   | I.p.absent              | NOT ASSESSED           |
| 19-3315          | 1561546                        | 26  | M      | multiple ulcers   | HIV POSITIVE | VDRL POSITIVE | NEGATIVO                  | branched crypts presents | dilated crypts present | inflamación basal presente                                   | neutrophils present | ABSENT            | 5                   | I.p.absent              | CHLAMYDIA IHC POSITIVE |
| 19-3587          | 1758950                        | 27  | M      | proctitis         | HIV POSITIVE | VDRL POSITIVE | POSITIVO                  | branched crypt absent    | dilated crypts present | inflamación crónica superficial presente y basal leve        | ABSENT              | ABSENT            | 0                   | I.p.absent              | CHLAMYDIA IHC POSITIVE |
| 19-4891 de Fuati | PARTICULAR                     | 30  | M      | proctitis         | HIV POSITIVE | VDRL NEGATIVE | NOT STATED                | branched crypts presents | dilated crypts present | basal inflammation                                           | neutrophils present | cryptitis present | 2                   | lymph follicles present | CHLAMYDIA IHC NEGATIVE |
| 19-5006          | 1765670                        | 28  | M      | ulcers and polyps | NOT STATED   | NOT STATED    | NOT STATED                | branched crypts presents | dilated crypts present | basal inflammation                                           | neutrophils present | cryptitis present | 0                   | lymph follicles present | CHLAMYDIA IHC NEGATIVE |
| 19-5431          | 1730736                        | 22  | M      | multiple ulcers   | HIV POSITIVE | VDRL NEGATIVE | NOT STATED                | branched crypt absent    | dilated crypts present | basal inflammation extending into submucosa                  | neutrophils present | cryptitis present | 1                   | I.p.absent              | CHLAMYDIA IHC POSITIVE |
| 19-5624          |                                | 54  | M      | multiple ulcers   | HIV POSITIVE | NOT STATED    | NOT STATED                | branched crypts presents | dilated crypts present | basal inflammation                                           | neutrophils present | cryptitis present | 0                   | I.p.absent              | CHLAMYDIA IHC NEGATIVE |
| 19-6793          | PARTICULAR                     | 37  | M      | multiple ulcers   | HIV NEGATIVE | NOT STATED    | NOT STATED                | branched crypt absent    | dilated crypts present | basal inflammation                                           | neutrophils present | cryptitis present | 4                   | lymph follicles present | CHLAMYDIA IHC POSITIVE |
| 19-6851          |                                | 37  | M      | single ulcer      | HIV POSITIVE | VDRL POSITIVE | POSITIVO                  | branched crypts presents | dilated crypts present | inflamación cronica basal presente                           | neutrophils present | cryptitis present | 2                   | I.p.absent              | CHLAMYDIA IHC POSITIVE |
| 19-8216          | PARTICULAR                     | 26  | M      | multiple ulcers   | HIV POSITIVE |               |                           | branched crypt absent    | dilated crypts present | basal inflammation                                           | neutrophils present | cryptitis present | 2                   | I.p.absent              | CHLAMYDIA IHC NEGATIVE |
| 20-0412-4        |                                | 38  | M      | tumor or mass     | HIV POSITIVE | VDRL NEGATIVE |                           | branched crypts presents | dilated crypts present | basal inflammation extending into submucosa and endarteritis | neutrophils present | cryptitis present | 3                   | I.p.absent              | NOT ASSESSED           |
| 20-0494          |                                | 18  | M      | proctitis         | NOT STATED   | NOT STATED    |                           | branched crypt absent    | dilated crypts present | basal inflammation                                           | neutrophils present | cryptitis present | 1                   | I.p.absent              | NOT ASSESSED           |
| 20-0668          |                                | 29  | M      | multiple ulcers   | HIV POSITIVE | NOT STATED    |                           | branched crypt absent    | dilated crypts present | basal inflammation                                           | neutrophils present | cryptitis present | 1                   | I.p.absent              | NOT ASSESSED           |
| 20-1069-2        |                                | 25  | M      | multiple ulcers   | NOT STATED   |               |                           | branched crypt absent    | dilatadas              | basal inflammation extending into submucosa and endarteritis | neutrophils present | ABSENT            | 5                   | I.p.absent              | CHLAMYDIA IHC NEGATIVE |
| 20-2327          |                                | 50  | M      | proctitis         | HIV POSITIVE | NOT STATED    | NOT STATED                | branched crypts presents | ABSENT                 | basal inflammation                                           | neutrophils present | ABSENT            | 4                   | lymph follicles present | CHLAMYDIA IHC POSITIVE |
| 20-3414          | INKAMAY SALUD                  | 21  | M      | multiple ulcers   | NOT STATED   | NOT STATED    |                           | branched crypt absent    | dilated crypts present | basal inflammation                                           | neutrophils present | ABSENT            | 0                   | I.p.absent              | CHLAMYDIA IHC POSITIVE |
| 20-4664          | SISOL VMT                      | 24  | M      | proctitis         | HIV POSITIVE | NOT STATED    |                           | branched crypt absent    | dilated crypts present | basal inflammation extending into submucosa and endarteritis | neutrophils present | ABSENT            | 1                   | I.p.absent              | CHLAMYDIA IHC POSITIVE |
| 20-4760          | OMAR CORO                      | 34  | M      | proctitis         | HIV POSITIVE |               |                           | branched crypt absent    | ABSENT                 | basal inflammation extending into submucosa and endarteritis | neutrophils present | cryptitis present | 8                   | lymph follicles present | CHLAMYDIA IHC NEGATIVE |
